# Supplementary material
Source: MDPI journal article supplement (https://www.mdpi.com/2079-6412/10/12/1157)
Supplement: s1 [file s1]

# Supplementary Materials: Understanding the Influence of High Velocity Thermal Spray Techniques on the Properties of Different Anti-Wear WC-Based Coatings

Andrea Garfias Bulnes, Vicente Albaladejo Fuentes, Irene Garcia Cano \* and Sergi Dosta

Thermal Spray Centre, CPT, Dpt. CMiQF. Universitat de Barcelona, 08028 Barcelona, Spain; agarfias.b@gmail.com (A.G.B.); valbaladejo@cptub.eu (V.A.F.); sdosta@cptub.eu (S.D.)

\* Correspondence: igcano@cptub.eu (I.G.C.)

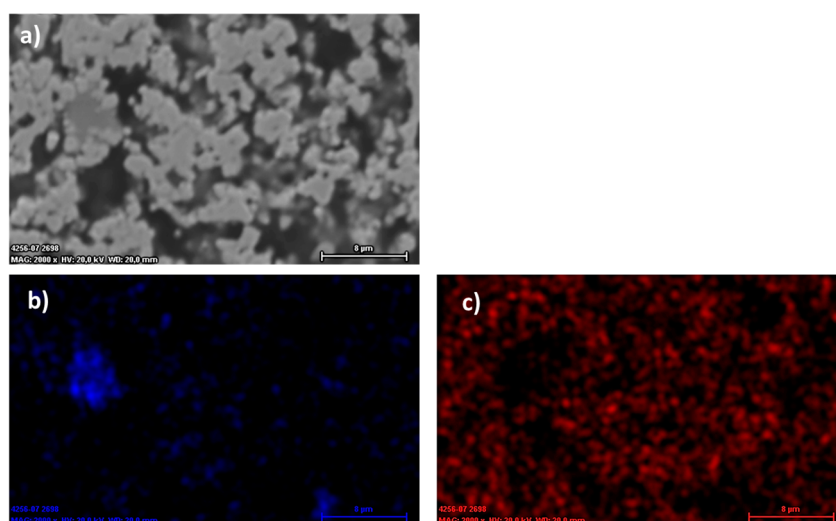

**Figure S1.** EDS mapping analysis of the WC-Co-m powder. (a) SEM image of the cross-section of the powder particle at 5000x (b) Co-rich regions (blue) and (c) W-rich regions (red).

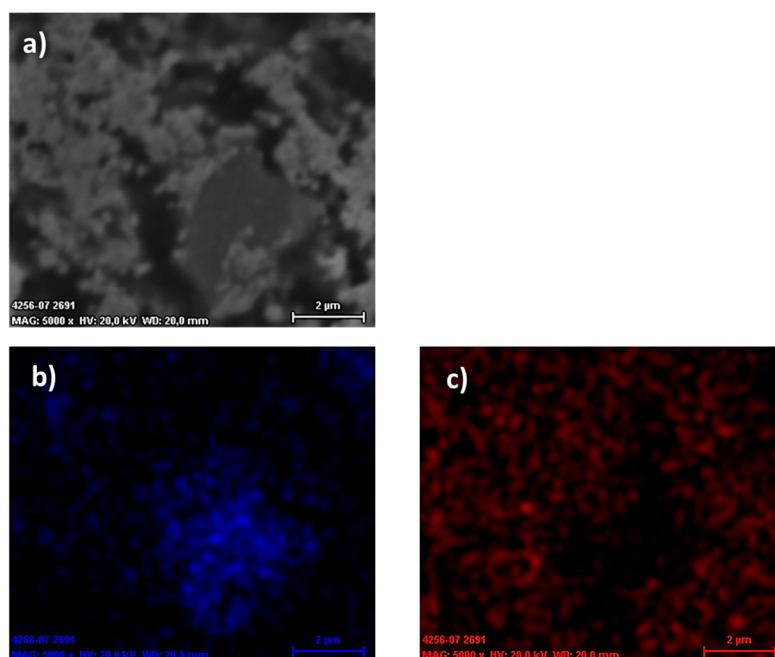

**Figure S2.** EDS mapping analysis of the WC-Co-n powder. (a) SEM image of the cross-section of the powder particle at 5000x, (b) Co-rich regions (blue) and (c) W-rich regions (red).

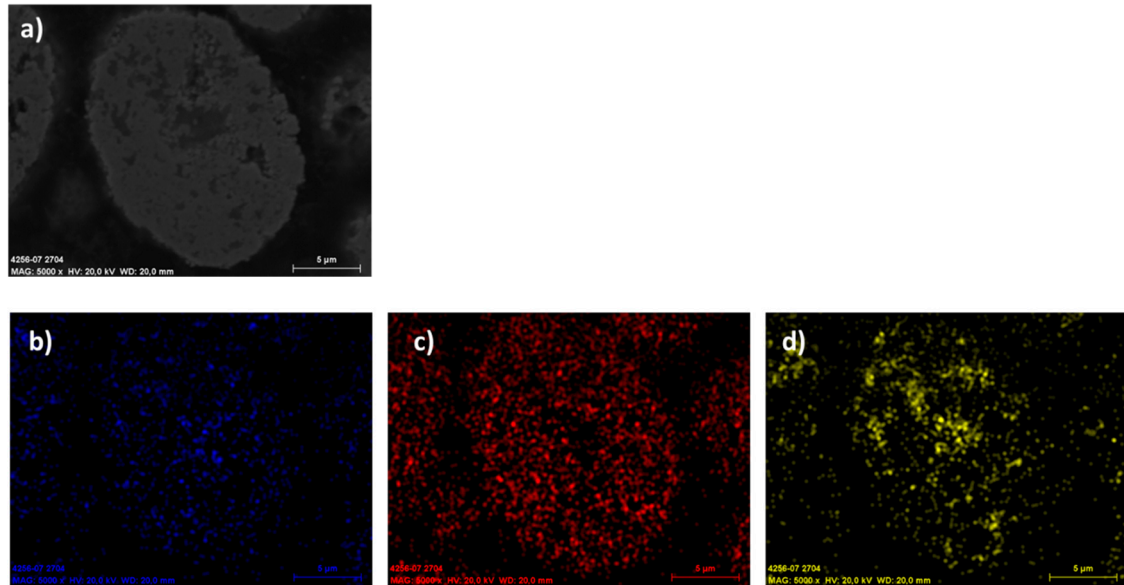

**Figure S3.** EDS mapping analysis of the WC-Co-Cr-n powder. (a) SEM image of the cross-section of the powder particle at 2000x, (b) Co-rich regions (blue), (c) W-rich regions (red) and (d) Cr-rich regions (yellow).

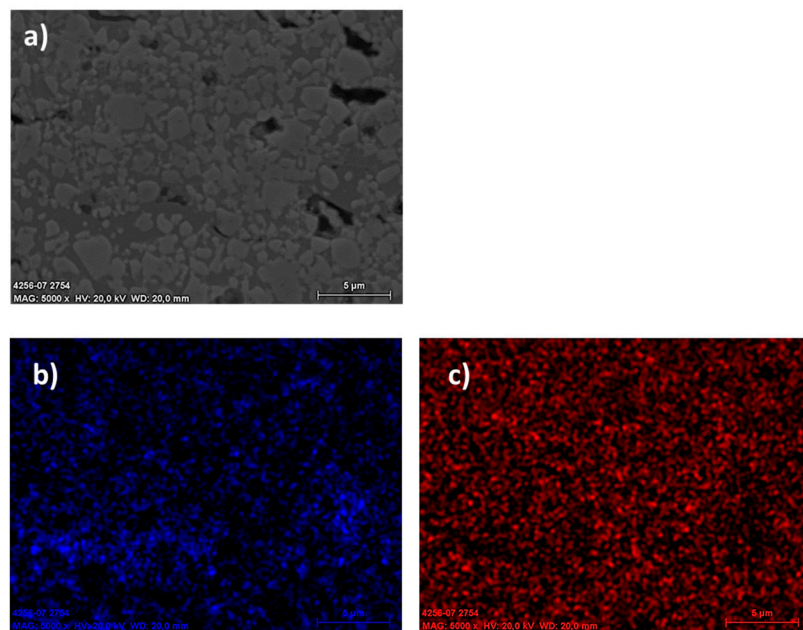

**Figure S4.** EDS mapping analysis of the HVOF-Co-m coating. (a) SEM image of the cross-section of the coating at 5000x, (b) Co-rich regions (blue) and (c) W-rich regions (red).

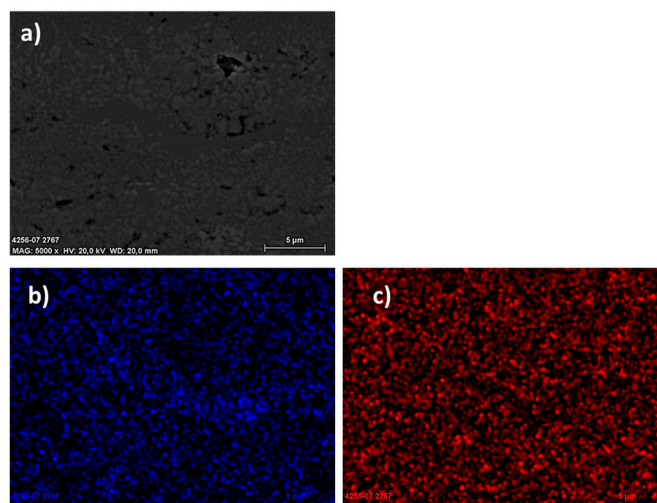

**Figure S5.** EDS mapping analysis of the HVOF-Co-n coating. (a) SEM image of the cross-section of the coating at 5000x, (b) Co-rich regions (blue) and (c) W-rich regions (red).

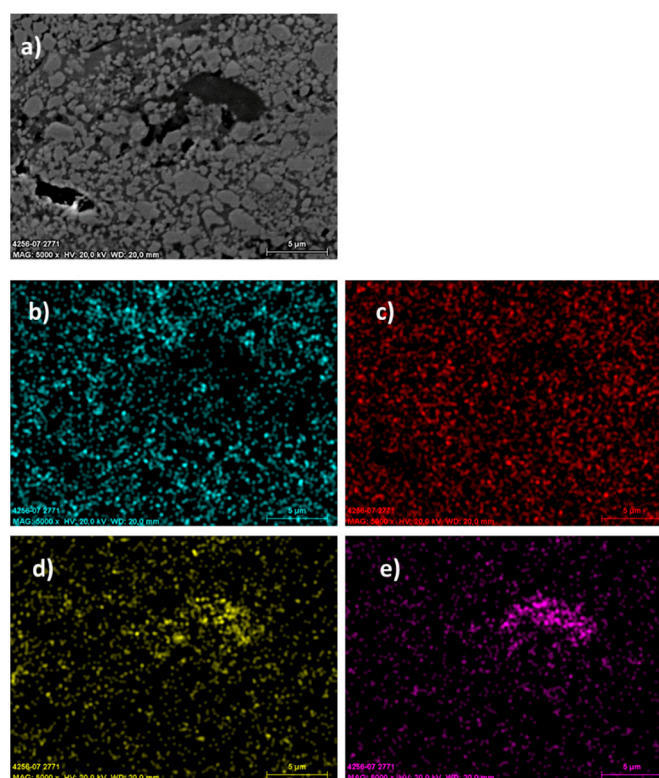

**Figure S6.** EDS mapping analysis of the HVOF-Ni coating. (a) SEM image of the cross-section of the coating at 5000x, (b) Ni-rich regions (bright blue), (c) W-rich regions (red), (d) Cr-rich regions (yellow) and (e) Mo-rich regions (pink).

**Publisher's Note:** MDPI stays neutral with regard to jurisdictional claims in published maps and institutional affiliations.

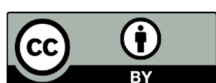

© 2020 by the authors. Submitted for possible open access publication under the terms and conditions of the Creative Commons Attribution (CC BY) license (<http://creativecommons.org/licenses/by/4.0/>).
